# Supplementary material
Source: PubMed Central journal article supplement (PMC8142140)
Supplement: sj-pdf-1-jcb-10.1177_0271678X20952012.pdf [file sj-pdf-1-jcb-10.1177_0271678X20952012.pdf]

**Supplementary Materials for “Hippocampal blood brain barrier permeability is related to the APOE4 mutation status of elderly individuals without dementia”**

**Supplementary Methods**

We used Inbrain (IB, MIDAS Information Technology Co., Ltd.), which is a Korean FDA-cleared software based on the FreeSurfer 6.0 platform enhanced with its own deep learning algorithm.<sup>1,2</sup> Inbrain IB (<https://www.inbrain.co.kr/index.html>) is similar to the segmentation method of FreeSurfer, which is based on volumetric- and surface-based segmentation and uses a template-driven approach.<sup>3</sup> The processing in IB was as follows: analysis failure prediction; intensity normalization; brain extraction; registration into the volume and surface atlas; white matter segmentation; white matter surface smoothing; topology correction; pial and white matter surface optimization; comparisons between output results and the database; and analysis quality management. Finally, the volumes of regional brain structures and of cortical thickness were obtained. A deep learning algorithm was applied to the multiple steps, including analysis failure prediction, brain extraction, white matter segmentation, and analysis quality management to enhance the quality of the segmentation results. The processing time was approximately 4 hours.

References

1. Cho Y, Seong JK, Jeong Y, Shin SY. Individual subject classification for Alzheimer's disease based on incremental learning using a spatial frequency representation of cortical thickness data. *Neuroimage* 2012;59:2217-2230
2. Lee JS, Kim C, Shin JH, Cho H, Shin DS, Kim N, et al. Machine Learning-based Individual Assessment of Cortical Atrophy Pattern in Alzheimer's Disease Spectrum: Development of the Classifier and Longitudinal Evaluation. *Sci Rep* 2018;8:4161
3. Lee JY, Oh SW, Chung MS, Park JE, Moon Y, Jeon H, et al. Clinical available software for automatic brain volumetry: comparisons of volume measurements and validation of intermethod reliability. *Korean J Radiol* (in press)
