# Supplementary material
Source: PubMed Central journal article supplement (PMC8142140)
Supplement: sj-pdf-2-jcb-10.1177_0271678X20952012.pdf [file sj-pdf-2-jcb-10.1177_0271678X20952012.pdf]

**Supplementary Materials for “Hippocampal blood brain barrier permeability is related to the APOE4 mutation status of elderly individuals without dementia”**

Supplementary Table 1. MR protocol details.

|                             | <b>3D MPRAGE</b> | <b>3D FLAIR</b> | <b>3D SWI</b> | <b>DCE-MRI</b>                        |
|-----------------------------|------------------|-----------------|---------------|---------------------------------------|
| <b>TR (ms)</b>              | 2300             | 5000            | 29            | 3.1                                   |
| <b>TE (ms)</b>              | 2.98             | 393             | 20            | 1.04                                  |
| <b>TI (ms)</b>              | 900              | 1800            |               |                                       |
| <b>Flip Angle (°)</b>       | 9                |                 | 15            | 10                                    |
| <b>FOV (mm)</b>             | 256×256          | 256×256         | 220           | 225×240                               |
| <b>Slice thickness (mm)</b> | 1                | 1               | 2             | 3                                     |
| <b>Matrix</b>               | 256×256          | 256×256         | 512×512       | 180×192                               |
| <b>Voxel size</b>           | 1×1×1            | 1×1×1           | 0.43×0.43×2   | 1.25×1.25×3                           |
| <b>NEX</b>                  | 1                | 1               | 1             |                                       |
| <b>GRAPPA factor</b>        | 2                | 2               | 2             |                                       |
| <b>Other features</b>       |                  |                 |               | 60 dynamics, 10 s temporal resolution |

3D MPRAGE: three-dimensional magnetization prepared-rapid gradient echo; 3D FLAIR: three-dimensional fluid attenuated inversion recovery; 3D SWI: three-dimensional susceptibility-weighted imaging; DCE: dynamic-contrast enhancement; TR: repetition time; TE: time to echo; TI: inversion time; FOV: field of view; NEX: number of excitation; GRAPPA: GeneRalized autocalibrating partial parallel acquisition.

## Supplementary Tables and Figures

Supplementary Table 2. Regional comparison of the BBB permeability rate ( $K_{trans}$ ,  $\times 10^{-3}\text{min}^{-1}$ ) for the total population.

|                     | <b>Region of Interest</b> | <b>Subjects with NC<br/>(n=33)</b> | <b>Subjects with<br/>MCI (n=33)</b> | <b>P value†</b> |
|---------------------|---------------------------|------------------------------------|-------------------------------------|-----------------|
| <b>CORTEX</b>       | Inferior Temporal         | 0.595 ± 0.561                      | 0.623 ± 0.474                       | 0.232           |
|                     | right                     | 0.630 ± 0.666                      | 0.653 ± 0.521                       | 0.123           |
|                     | left                      | 0.560 ± 0.498                      | 0.593 ± 1.418                       | 0.510           |
|                     | Lateral Orbitofrontal     | 0.703 ± 0.485                      | 0.955 ± 1.008                       | 0.126           |
|                     | right                     | 0.739 ± 0.550                      | 1.028 ± 1.023                       | 0.076           |
|                     | left                      | 0.667 ± 0.474                      | 0.882 ± 1.109                       | 0.260           |
|                     | Medial Orbitofrontal      | 0.350 ± 0.354                      | 0.487 ± 0.473                       | 0.065           |
|                     | right                     | 0.374 ± 0.386                      | 0.527 ± 0.548                       | 0.068           |
|                     | left                      | 0.327 ± 0.328                      | 0.447 ± 0.426                       | 0.075           |
| <b>DEEP GRAY</b>    | Caudate Nucleus           | 0.482 ± 0.327                      | 0.999 ± 1.070                       | 0.055           |
|                     | right                     | 0.515 ± 0.489                      | 1.029 ± 1.233                       | 0.163           |
|                     | left                      | 0.449 ± 0.297                      | 0.968 ± 0.959                       | 0.016*          |
|                     | Putamen                   | 0.442 ± 0.383                      | 0.648 ± 0.681                       | 0.085           |
|                     | right                     | 0.486 ± 0.457                      | 0.686 ± 0.877                       | 0.122           |
|                     | left                      | 0.397 ± 0.377                      | 0.609 ± 0.603                       | 0.098           |
|                     | Globus Pallidus           | 0.578 ± 0.489                      | 0.802 ± 0.853                       | 0.291           |
|                     | right                     | 0.594 ± 0.535                      | 0.755 ± 0.898                       | 0.438           |
|                     | left                      | 0.562 ± 0.485                      | 0.848 ± 0.935                       | 0.231           |
|                     | Thalamus                  | 0.733 ± 0.596                      | 0.936 ± 0.769                       | 0.517           |
|                     | right                     | 0.709 ± 0.588                      | 0.878 ± 0.733                       | 0.539           |
|                     | left                      | 0.758 ± 0.618                      | 0.994 ± 0.837                       | 0.511           |
|                     | Hippocampus               | 0.575 ± 0.740                      | 0.570 ± 0.457                       | 0.557           |
|                     | right                     | 0.559 ± 0.720                      | 0.586 ± 0.564                       | 0.400           |
|                     | left                      | 0.575 ± 0.788                      | 0.555 ± 0.524                       | 0.781           |
| <b>WHITE MATTER</b> | Frontoparietal WM         | 0.812 ± 1.006                      | 0.660 ± 1.001                       | 0.621           |
|                     | right                     | 0.713 ± 0.923                      | 0.510 ± 0.658                       | 0.438           |

Supplementary Tables and Figures

|              |               |               |       |
|--------------|---------------|---------------|-------|
| left         | 0.912 ± 1.167 | 0.809 ± 1.418 | 0.777 |
| Cingulate WM | 0.381 ± 0.491 | 0.384 ± 0.662 | 0.652 |
| right        | 0.380 ± 0.545 | 0.362 ± 0.749 | 0.561 |
| left         | 0.383 ± 0.490 | 0.385 ± 0.617 | 0.791 |
| Temporal WM  | 0.803 ± 1.228 | 0.649 ± 1.116 | 0.982 |
| right        | 0.625 ± 1.077 | 0.722 ± 1.468 | 0.626 |
| left         | 0.983 ± 1.637 | 0.575 ± 0.999 | 0.622 |

\* denotes significance; P value < 0.05. Data are presented as the mean ± standard deviation.

† denotes that a p-value was derived from an analysis of covariance adjusted for age, sex, education, vascular risk burden score, and normalized hippocampal volume.

NC: normal cognition; BBB: blood brain barrier; MCI: mild cognitive impairment; WM: white matter.

## Supplementary Tables and Figures

Supplementary Table 3-1. Regional comparison of the BBB permeability rate ( $K_{trans}$ ,  $\times 10^{-3}\text{min}^{-1}$ ) according to APOE4 status (n=35).

|                     | Region of Interest    | Non-carrier<br>(n=18) | APOE4 carrier<br>(n=17) | P value† |
|---------------------|-----------------------|-----------------------|-------------------------|----------|
| <b>CORTEX</b>       | Inferior Temporal     | 0.667 $\pm$ 0.518     | 0.655 $\pm$ 0.522       | 0.623    |
|                     | right                 | 0.703 $\pm$ 0.582     | 0.697 $\pm$ 0.673       | 0.716    |
|                     | left                  | 0.631 $\pm$ 0.498     | 0.614 $\pm$ 0.547       | 0.577    |
|                     | Lateral Orbitofrontal | 1.185 $\pm$ 1.178     | 0.840 $\pm$ 0.734       | 0.228    |
|                     | right                 | 1.204 $\pm$ 1.108     | 0.955 $\pm$ 0.962       | 0.357    |
|                     | left                  | 1.166 $\pm$ 1.376     | 0.725 $\pm$ 0.585       | 0.191    |
|                     | Medial Orbitofrontal  | 0.513 $\pm$ 0.528     | 0.478 $\pm$ 0.494       | 0.904    |
|                     | right                 | 0.559 $\pm$ 0.589     | 0.513 $\pm$ 0.586       | 0.868    |
|                     | left                  | 0.467 $\pm$ 0.481     | 0.444 $\pm$ 0.416       | 0.955    |
| <b>DEEP GRAY</b>    | Caudate Nucleus       | 0.816 $\pm$ 0.772     | 0.810 $\pm$ 0.691       | 0.739    |
|                     | right                 | 0.795 $\pm$ 0.824     | 0.815 $\pm$ 0.827       | 0.852    |
|                     | left                  | 0.836 $\pm$ 0.762     | 0.804 $\pm$ 0.669       | 0.638    |
|                     | Putamen               | 0.657 $\pm$ 0.786     | 0.612 $\pm$ 0.532       | 0.682    |
|                     | right                 | 0.700 $\pm$ 1.112     | 0.695 $\pm$ 0.586       | 0.621    |
|                     | left                  | 0.615 $\pm$ 0.548     | 0.530 $\pm$ 0.547       | 0.845    |
|                     | Globus Pallidus       | 0.804 $\pm$ 0.971     | 0.780 $\pm$ 0.616       | 0.655    |
|                     | right                 | 0.780 $\pm$ 1.117     | 0.788 $\pm$ 0.643       | 0.549    |
|                     | left                  | 0.827 $\pm$ 0.877     | 0.772 $\pm$ 0.656       | 0.817    |
|                     | Thalamus              | 0.983 $\pm$ 0.797     | 0.978 $\pm$ 0.772       | 0.906    |
|                     | right                 | 0.941 $\pm$ 0.787     | 0.920 $\pm$ 0.727       | 0.847    |
|                     | left                  | 1.025 $\pm$ 0.836     | 1.036 $\pm$ 0.848       | 0.963    |
|                     | Hippocampus           | 0.406 $\pm$ 0.339     | 0.790 $\pm$ 0.512       | 0.007*   |
|                     | right                 | 0.498 $\pm$ 0.492     | 0.804 $\pm$ 0.610       | 0.033*   |
|                     | left                  | 0.320 $\pm$ 0.324     | 0.776 $\pm$ 0.584       | 0.010*   |
| <b>WHITE MATTER</b> | Frontoparietal WM     | 1.018 $\pm$ 1.376     | 0.612 $\pm$ 0.845       | 0.390    |
|                     | right                 | 0.848 $\pm$ 1.014     | 0.441 $\pm$ 0.659       | 0.353    |

Supplementary Tables and Figures

|              |               |               |       |
|--------------|---------------|---------------|-------|
| left         | 1.189 ± 1.830 | 0.783 ± 1.150 | 0.443 |
| Cingulate WM | 0.212 ± 0.327 | 0.407 ± 0.581 | 0.240 |
| right        | 0.213 ± 0.338 | 0.308 ± 0.562 | 0.565 |
| left         | 0.211 ± 0.384 | 0.505 ± 0.637 | 0.112 |
| Temporal WM  | 0.862 ± 1.559 | 0.702 ± 1.100 | 0.911 |
| right        | 0.739 ± 1.297 | 0.799 ± 1.767 | 0.698 |
| left         | 0.986 ± 1.192 | 0.606 ± 0.719 | 0.846 |

\* denotes significance at a P value < 0.05. Data are presented as the mean ± standard deviation.

† denotes that p values were derived from an analysis of covariance adjusted for age, sex, education, vascular risk burden score, and normalized hippocampal volume.

APOE: apolipoprotein E; WM: white matter.

## Supplementary Tables and Figures

Supplementary Table 3-2. Regional comparison of the plasma fractional volume (Vp) (%) according to APOE4 status (n=35) .

|                     | <b>Region of Interest</b> | <b>Non-carrier<br/>(n=18)</b> | <b>APOE4 carrier<br/>(n=17)</b> | <b>P value</b> |
|---------------------|---------------------------|-------------------------------|---------------------------------|----------------|
| <b>CORTEX</b>       | Inferior Temporal         | 3.523 ± 1.443                 | 2.669 ± 0.913                   | 0.003*         |
|                     | right                     | 3.224 ± 1.257                 | 2.438 ± 0.964                   | 0.005*         |
|                     | left                      | 3.821 ± 1.704                 | 2.902 ± 0.993                   | 0.004*         |
|                     | Lateral Orbitofrontal     | 2.073 ± 1.131                 | 1.568 ± 0.522                   | 0.056          |
|                     | right                     | 2.086 ± 1.069                 | 1.734 ± 0.603                   | 0.143          |
|                     | left                      | 2.070 ± 1.287                 | 1.403 ± 0.567                   | 0.038          |
|                     | Medial Orbitofrontal      | 1.269 ± 0.402                 | 1.242 ± 0.389                   | 0.668          |
|                     | right                     | 1.222 ± 0.329                 | 1.156 ± 0.372                   | 0.451          |
|                     | left                      | 1.316 ± 0.503                 | 1.328 ± 0.439                   | 0.894          |
|                     | <b>DEEP GRAY</b>          | Caudate Nucleus               | 1.056 ± 0.529                   | 1.285 ± 0.447  |
| right               |                           | 1.523 ± 0.592                 | 1.303 ± 0.461                   | 0.187          |
| left                |                           | 1.489 ± 0.604                 | 1.267 ± 0.492                   | 0.152          |
| Putamen             |                           | 2.394 ± 1.077                 | 1.888 ± 0.630                   | 0.023*         |
| right               |                           | 2.353 ± 1.028                 | 1.776 ± 0.517                   | 0.003*         |
| left                |                           | 2.436 ± 1.233                 | 1.999 ± 0.856                   | 0.120          |
| Globus Pallidus     |                           | 1.796 ± 1.021                 | 1.251 ± 0.676                   | 0.005*         |
| right               |                           | 1.784 ± 1.037                 | 1.209 ± 0.665                   | 0.004*         |
| left                |                           | 1.807 ± 1.062                 | 1.294 ± 0.746                   | 0.011*         |
| Thalamus            |                           | 1.706 ± 0.840                 | 1.595 ± 0.979                   | 0.369          |
| right               |                           | 1.601 ± 0.769                 | 1.542 ± 1.068                   | 0.435          |
| left                |                           | 1.811 ± 0.931                 | 1.647 ± 1.051                   | 0.356          |
| Hippocampus         |                           | 2.716 ± 1.989                 | 3.327 ± 3.712                   | 0.951          |
| right               |                           | 2.294 ± 1.272                 | 3.219 ± 2.914                   | 0.683          |
| left                | 3.138 ± 2.901             | 3.434 ± 4.683                 | 0.760                           |                |
| <b>WHITE MATTER</b> | Frontoparietal WM         | 1.506 ± 1.009                 | 1.356 ± 0.632                   | 0.223          |
|                     | right                     | 1.186 ± 0.924                 | 1.016 ± 0.724                   | 0.278          |

Supplementary Tables and Figures

|              |               |               |        |
|--------------|---------------|---------------|--------|
| left         | 1.826 ± 1.268 | 1.696 ± 0.700 | 0.268  |
| Cingulate WM | 0.542 ± 0.550 | 0.528 ± 0.532 | 0.836  |
| right        | 0.463 ± 0.514 | 0.464 ± 0.479 | 0.928  |
| left         | 0.622 ± 0.656 | 0.592 ± 0.610 | 0.776  |
| Temporal WM  | 3.590 ± 2.639 | 2.951 ± 2.249 | 0.021* |
| right        | 2.859 ± 2.303 | 2.288 ± 1.960 | 0.042* |
| left         | 4.321 ± 3.167 | 3.615 ± 3.057 | 0.032* |

\* denotes significance at a p value <0.05. Data are presented as the mean ± standard deviation.

† denotes that p values were derived from an analysis of covariance adjusted for age, sex, education, vascular risk burden score, and normalized hippocampal volume.

APOE: apolipoprotein E; WM: white matter.

Supplementary Figures

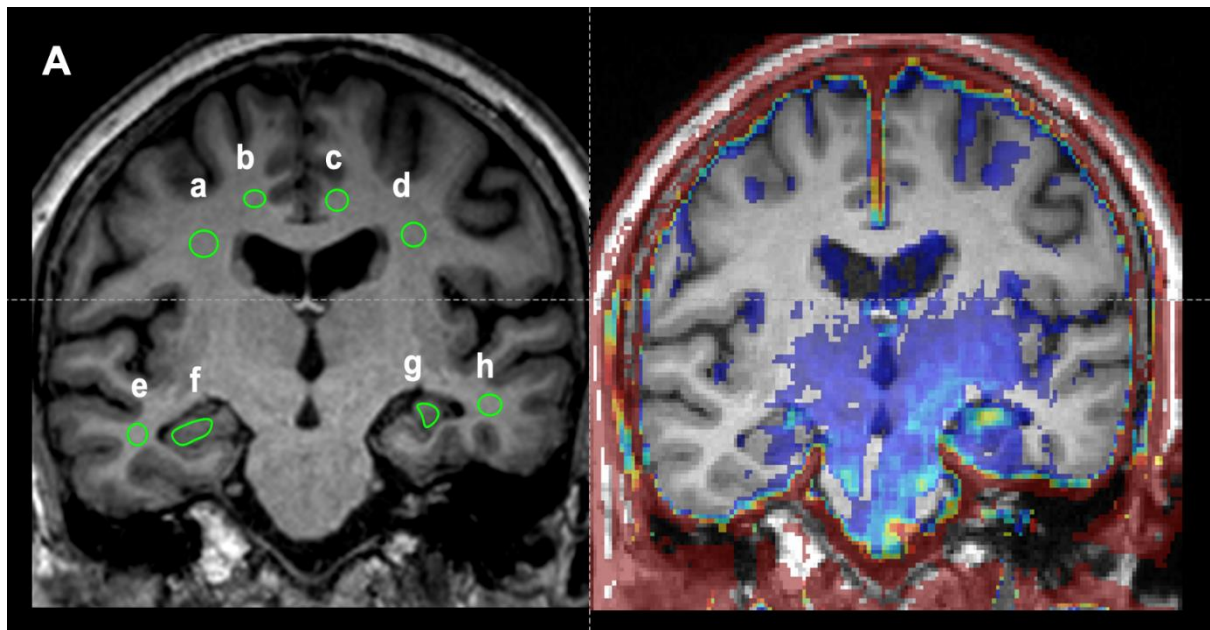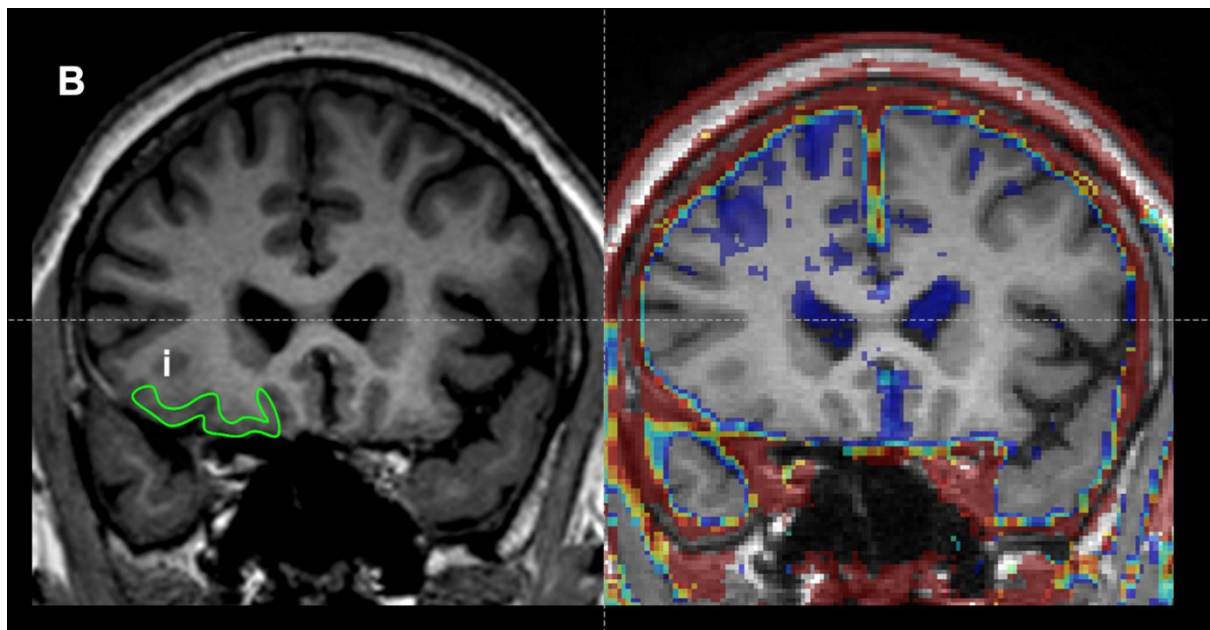



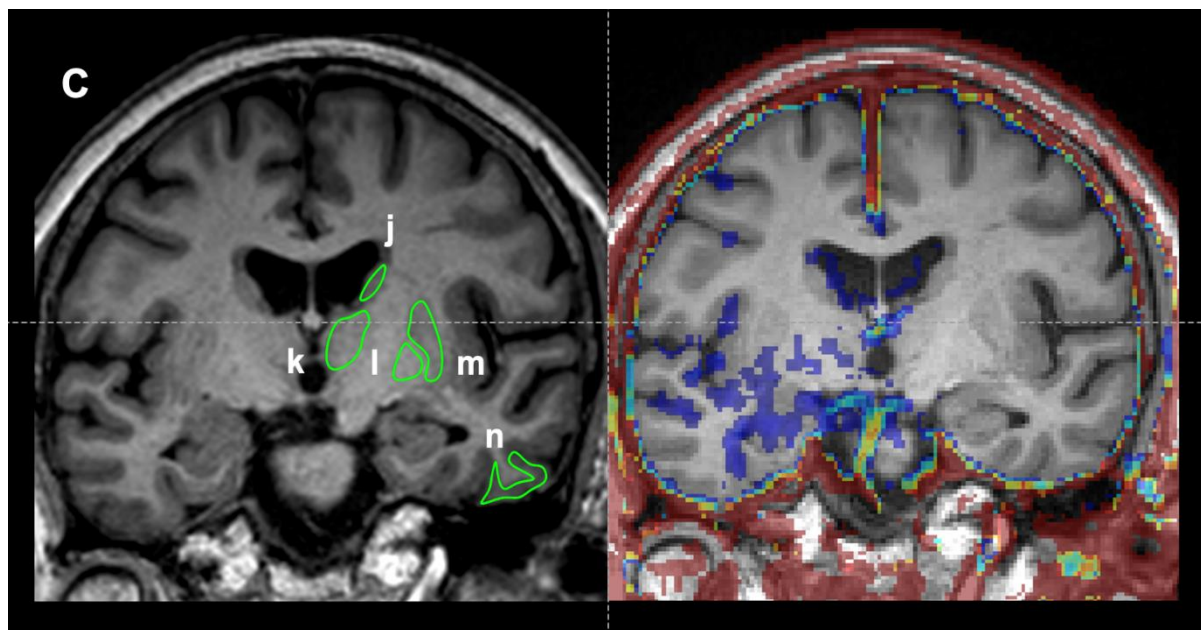

Supplementary Figure 1. Region of interest (ROI) placement onto T1 volumetric images. A. a, right frontoparietal white matter (WM); b, right cingulate WM; c, left cingulate WM; d, left frontoparietal WM; e, right temporal WM; f, right hippocampus; g, left hippocampus; h, left temporal WM. B. The level of corpus callosal genu; i, lateral orbitofrontal cortex. C. The level of mammillary body; j, caudate nucleus; k, thalamus; l, globus pallidus; m, putamen; n, inferior temporal gyrus. ROIs drawn on T1 volumetric images were transferred to the co-registered  $K_{trans}$  map for analysis.
